# Supplementary material for: Selective separation of aqueous sulphate anions via crystallization of sulphate–water clusters
Source: Royal Society of Chemistry journal article supplement (doi:10.1039/c7ce00693d), 2017-01-01
Supplement: c7ce00693d1.pdf [file c7ce00693d1.pdf]

## Supporting Information

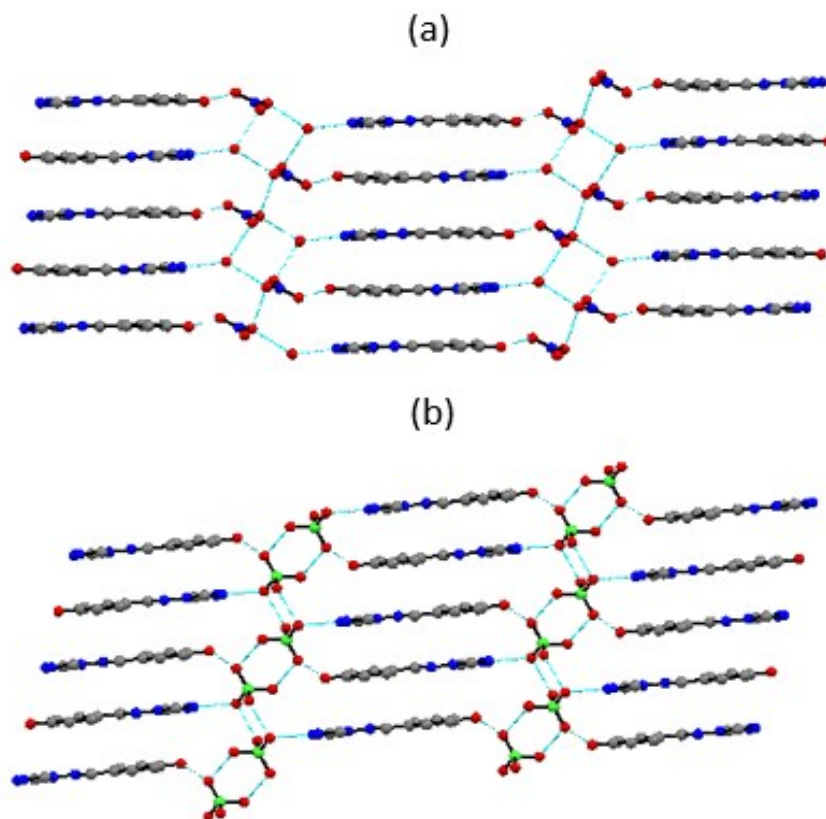

**Figure S1.** Hydrogen bonding and close contacts patterns of the cationic stacks with the nitrate-water clusters and perchlorate clusters in salts  $[HL_3]^+[NO_3] \cdot (H_2O)$  (a), and  $[HL_3]^+[ClO_4] \cdot [HL_4]^+[NO_3]$  (b), respectively, viewed down the crystallographic *b* axis. Hydrogen atoms were omitted for sake of clarity.

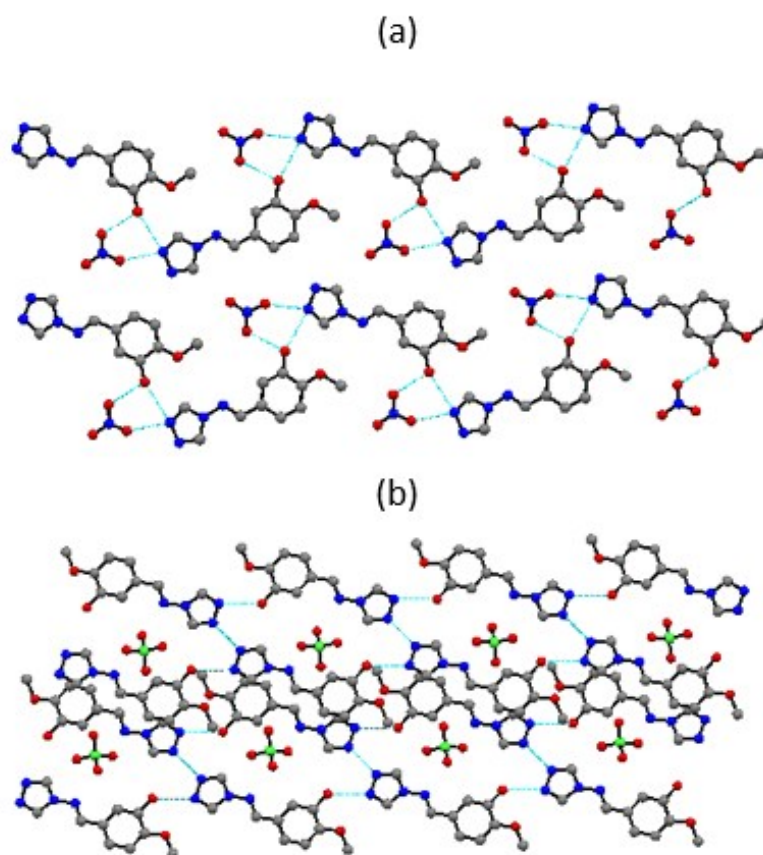

**Figure S2.** Hydrogen bonding patterns of the cationic layers with the nitrate and perchlorate anions in salts  $[HL_4]^+[\text{NO}_3]^-$  (a) and  $[L_4][HL_4]^+[\text{ClO}_4]^-$  (b), respectively, viewed down the crystallographic  $c$  axis. Hydrogen atoms were omitted for sake of clarity.

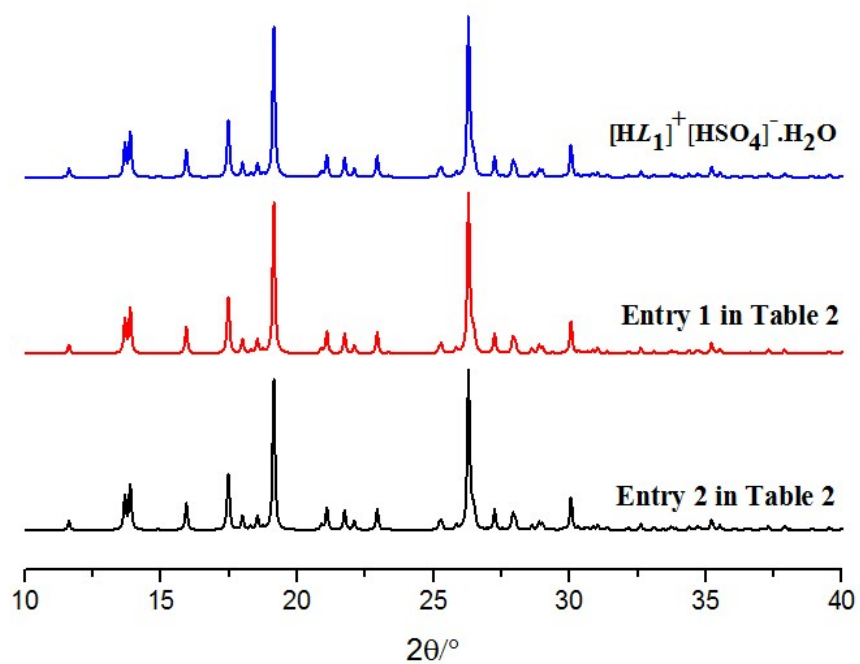

**Figure S3.** PXRD patterns for salts  $[\text{HL}_1]^+[\text{HSO}_4]^{2-} \cdot 2(\text{H}_2\text{O})$ , and the entries 1 and 2 in Table 2.

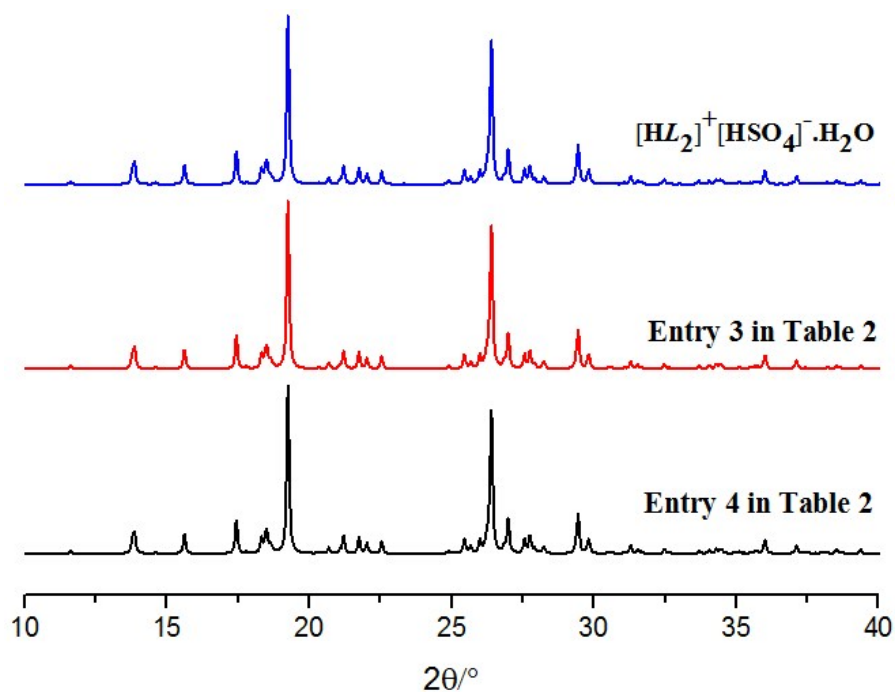

**Figure S4.** PXRD patterns for salts  $[\text{HL}_2]^+[\text{HSO}_4]^{2-} \cdot 2(\text{H}_2\text{O})$ , and the entries 3 and 4 in Table 2.

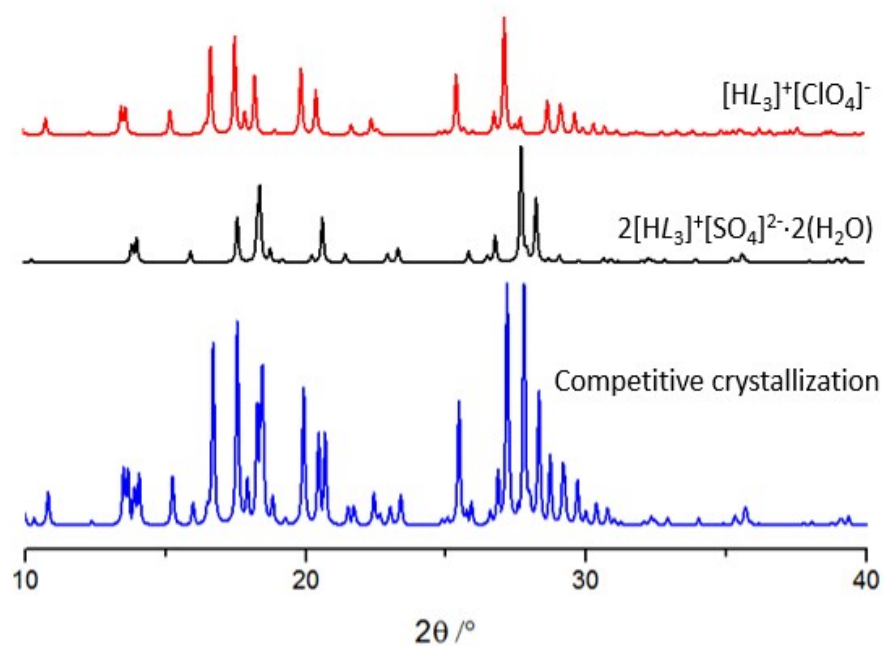

**Figure S5.** PXRD patterns for salts  $2[\text{HL}_3]^+[\text{SO}_4]^{2-} \cdot 2(\text{H}_2\text{O})$ ,  $[\text{HL}_3]^+[\text{ClO}_4]^-$  and the competitive sulfate/ perchlorate crystallization of entry 6 in Table 2.

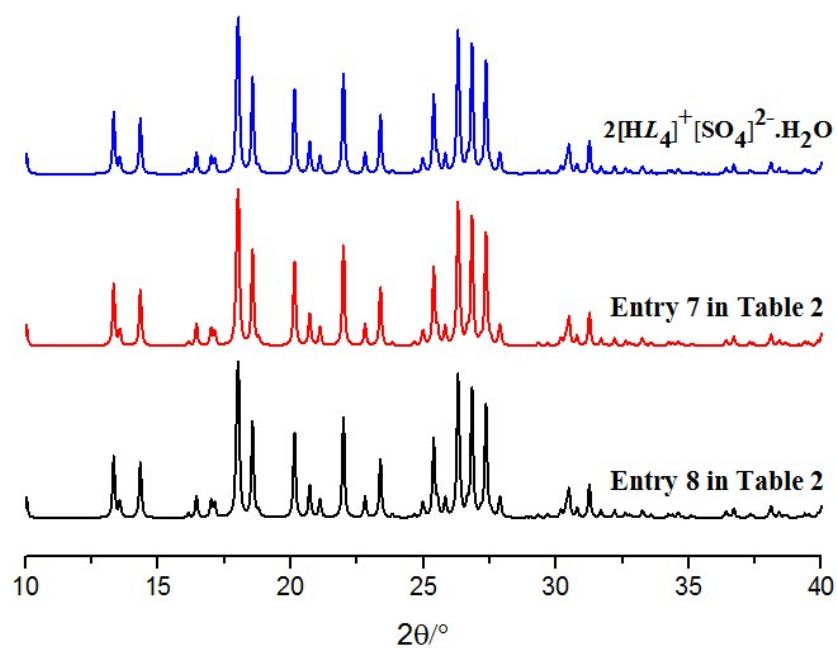

**Figure S6.** PXRD patterns for salts  $2[\text{HL}_4]^+[\text{SO}_4]^{2-} \cdot 2(\text{H}_2\text{O})$ , and the entries 7 and 8 in Table 2.

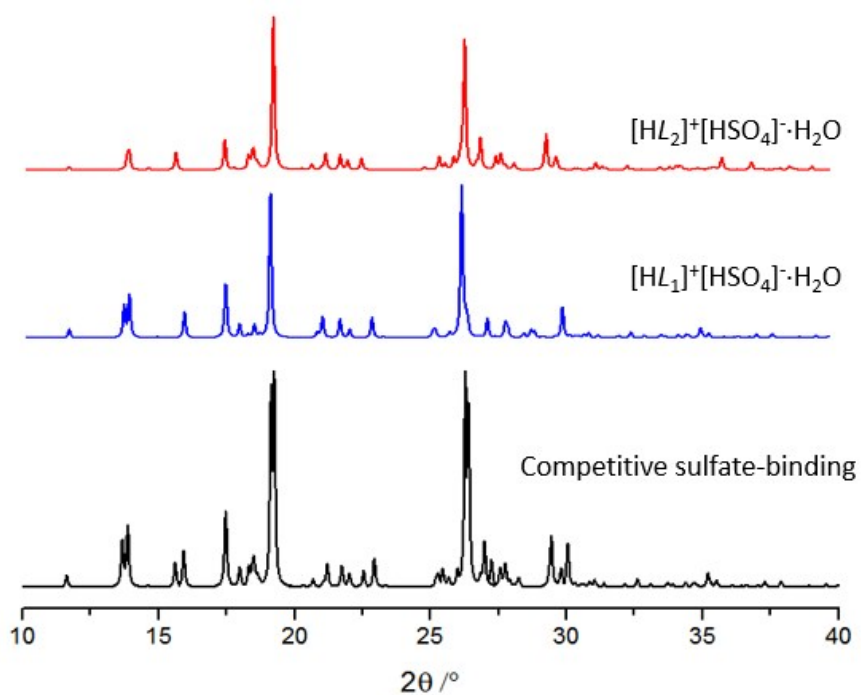

**Figure S7.** PXRD patterns for salts  $[\text{HL}_1]^+[\text{HSO}_4]^- \cdot \text{H}_2\text{O}$ ,  $[\text{HL}_2]^+[\text{HSO}_4]^- \cdot \text{H}_2\text{O}$  and the competitive  $L_1$  and  $L_2$  sulfate-binding (entry 1 in Table 3).

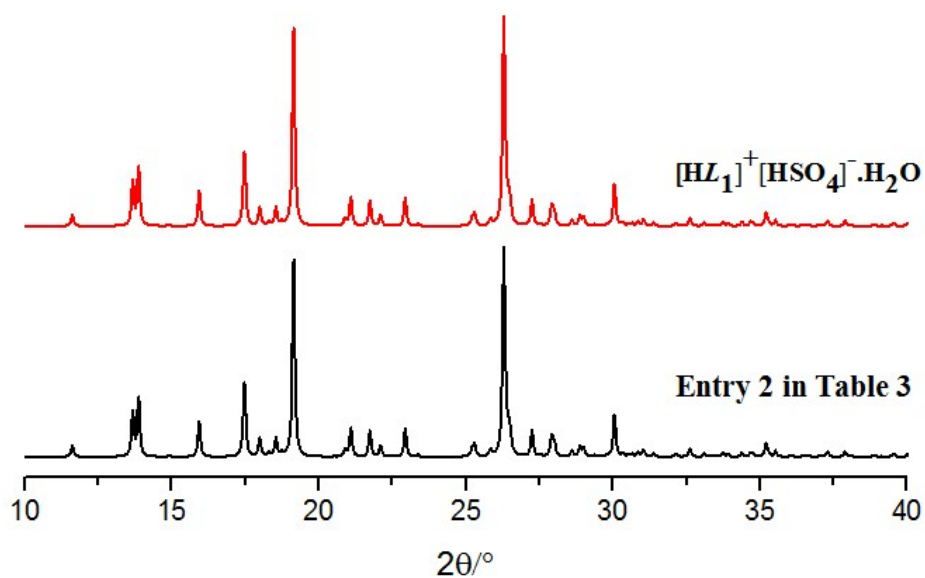

**Figure S8.** PXRD patterns for salts  $[\text{HL}_1]^+[\text{HSO}_4]^- \cdot \text{H}_2\text{O}$  and the competitive  $L_1$  and  $L_3$  sulfate-binding (entry 2 in Table 3).

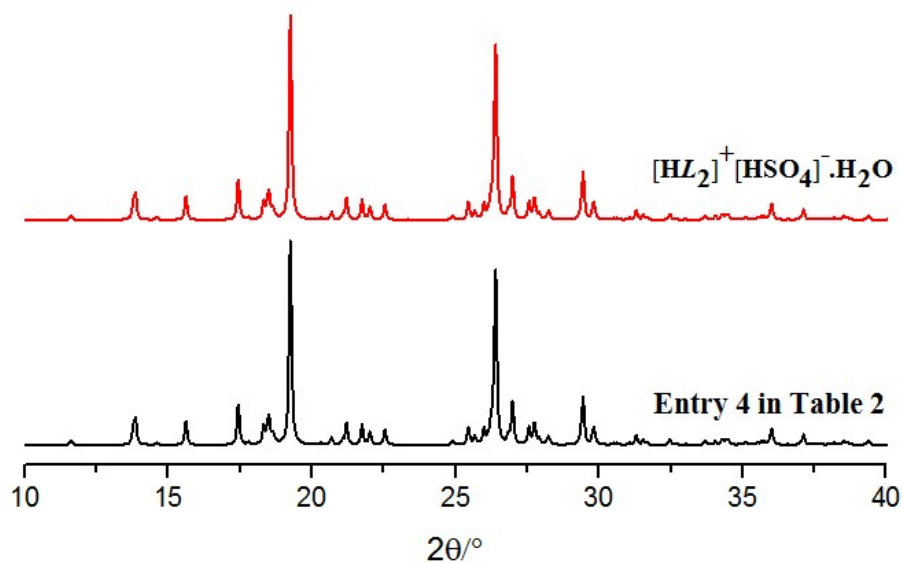

**Figure S9.** PXRD patterns for salts  $[\text{HL}_2]^+[\text{HSO}_4]^- \cdot \text{H}_2\text{O}$  and the competitive  $L_2$  and  $L_3$  sulfate-binding (entry 4 in Table 3).

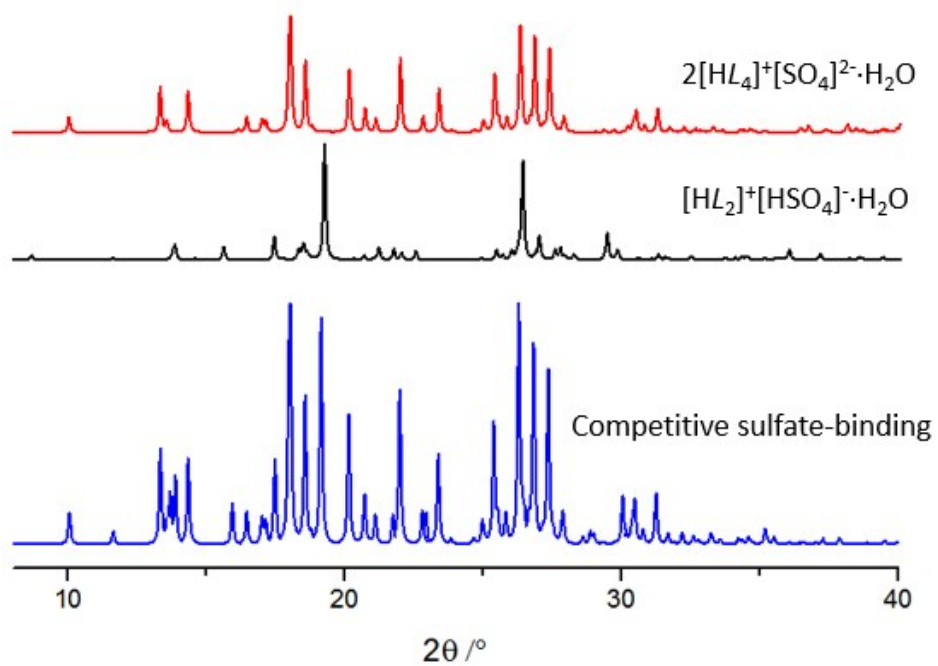

**Figure S10.** PXRD patterns for salts  $[\text{HL}_2]^+[\text{HSO}_4]^- \cdot \text{H}_2\text{O}$ ,  $2[\text{HL}_4]^+[\text{SO}_4]^{2-} \cdot \text{H}_2\text{O}$  and the competitive  $L_2$  and  $L_4$  sulfate-binding (entry 5 in Table 3).

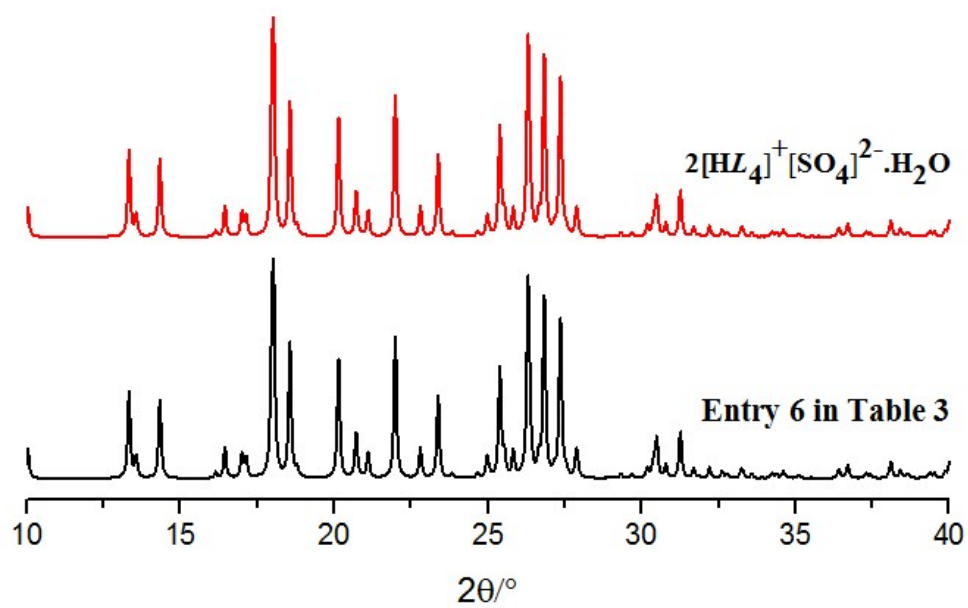

**Figure S11.** PXRD patterns for salts  $2[\text{HL}_4]^+[\text{SO}_4]^{2-} \cdot \text{H}_2\text{O}$  and the competitive  $L_3$  and  $L_4$  sulfate-binding (entry 6 in Table 3).
